# Supplementary material
Source: Royal Society of Chemistry journal article supplement (doi:10.1039/d6ta01576j)
Supplement: d6ta01576j1.pdf [file d6ta01576j1.pdf]

## **Supplementary Materials: Electrochemo-Mechanical Coupled Behaviors in Sodium-Ion Batteries Upon Stack Pressure**

Bo Rui<sup>1,2</sup>, Youngwon Hahn<sup>3</sup>, Amit Bhowmick<sup>1,2</sup>, Farzaneh Mousavi<sup>3</sup>, Sandeep Kulathu<sup>3</sup>, Victor  
Oancea<sup>3</sup>, and Jun Xu<sup>1,2,4\*</sup>

*<sup>1</sup>Department of Mechanical Engineering, University of Delaware, Newark, DE 19716, USA*

*<sup>2</sup>Energy Mechanics and Sustainability Laboratory (EMSLab), University of Delaware, Newark, DE  
19716, USA*

*<sup>3</sup>Dassault Systèmes Americas Corp., 1301 Atwood Ave, Suite 101W, Johnston, RI 02919, USA*

*<sup>4</sup>Data Science Institute, University of Delaware, Newark, DE 19716, USA*

---

\* Corresponding to: Prof. Jun Xu at [junxu@udel.edu](mailto:junxu@udel.edu)

**Table. S1** Geometry of the jellyroll

| Parameters                   | Values   | Source   |
|------------------------------|----------|----------|
| 3D geometry of the jellyroll |          |          |
| $t^j$                        | 5.6 mm   | Measured |
| $w^j$                        | 18.2 mm  | Measured |
| $\delta^c$                   | 0.122 mm | Measured |
| $\delta^a$                   | 0.247 mm | Measured |
| $\delta^{se}$                | 0.018 mm | Measured |
| $\delta^{pc}$                | 0.015 mm | Measured |
| $\delta^{nc}$                | 0.012 mm | Measured |

**Table. S2** The main equations of the governing computational framework [1–7]

| Mechanical model             |                                                                                                                                                         |
|------------------------------|---------------------------------------------------------------------------------------------------------------------------------------------------------|
| Function name                | Function                                                                                                                                                |
| Mechanical equilibrium       | $\nabla \cdot \boldsymbol{\sigma} + \mathbf{b} = 0$                                                                                                     |
| Constitutive relation        | $\boldsymbol{\sigma} = \mathbf{D}^{el} : (\boldsymbol{\varepsilon} - \boldsymbol{\varepsilon}^{eig}) = \mathbf{D}^{el} : \boldsymbol{\varepsilon}^{el}$ |
| Electrochemical model        |                                                                                                                                                         |
| Solid potential              | $i_s = -\sigma_s^{eff} \nabla \phi_s$                                                                                                                   |
| Electrolyte potential        | $i_e = -\sigma_e^{eff} \nabla \phi_e + \frac{2\sigma_e^{eff} RT}{F} \left( 1 + \frac{d \ln f}{d \ln c_i} \right) (1 - t_+) \nabla \ln c_e$              |
| Transport in solid           | $\frac{\partial c_s}{\partial t} = D_s \frac{1}{r^2} \frac{\partial}{\partial r} \left( r^2 \frac{\partial c_s}{\partial r} \right)$                    |
| Boundary conditions          | $\frac{\partial c_s}{\partial r} \Big _{r=0} = 0, -D_s \frac{\partial c_s}{\partial r} \Big _{r=r_s} = \frac{j^{Li}}{a_s F}$                            |
| Transport in the electrolyte | $\varepsilon_e \frac{\partial c_e}{\partial t} = \nabla \cdot (D_e^{eff} \nabla c_e) + \frac{a j_{loc}}{F} (1 - t_+)$                                   |
| Reaction rate                | $j_{loc} = j_0 \left\{ \exp \left( \frac{\alpha^{ng} \eta F}{R_g T} \right) - \exp \left( \frac{-\alpha^{ps} \eta F}{R_g T} \right) \right\}$           |
| Overpotential                | $\eta = \phi_s - \phi_e - U$                                                                                                                            |
| Initial condition            | $c_e = c_e^0, c_s = c_s^0, T = T^0$                                                                                                                     |

**Table. S3** The material parameters of the SIBs

| Parameters              | Unit      | Cathode                                   | Separator                       | Anode                                    |
|-------------------------|-----------|-------------------------------------------|---------------------------------|------------------------------------------|
| Density                 | $kg/m^3$  | $\rho^{Al} = 2770$<br>$\rho^c = 2900$ [a] | $\rho^{se} = 817.7$ [c]         | $\rho^{Al} = 2770$<br>$\rho^a = 800$ [a] |
| Elastic constants       | $MPa$     | $E^c = 2275$ [c]                          | $E^{se} = 555$ [c]              | $E^a = 2260$ [c]                         |
| Poisson' ratio          | 1         | $\nu^c = 0.3$                             | $\nu^{se} = 0.3$                | $\nu^a = 0.3$                            |
| Electrical conductivity | S/m       | $\kappa^c = 50$ [8]                       | $\kappa^{se} = 0.7325$          | $\kappa^a = 256$ [8]                     |
| Diffusion coefficient   | $m^2/s$   | $D^c (c_{NNMF})$ [b]                      | $D^{se} = 1.81 \times 10^{-10}$ | $D^a (c_{HC})$ [b]                       |
| Maximum concentration   | $mol/m^3$ | $c_{eq}^c = 15148$ [a]                    |                                 | $c_{eq}^a = 8357$ [a]                    |
| Equilibrium potential   | V         | $E_{eq}^c (c_{NNMF})$ [9]                 |                                 | $E_{eq}^a (c_{HC})$ [8]                  |
| Rate constant           | $m/s$     | $k^c (c_{NNMF})$ [b]                      |                                 | $k^a (c_{HC})$ [b]                       |

[a] Directly from manufacturer's data or calculated

[b] Calibrated by experimental results

[c] Measured

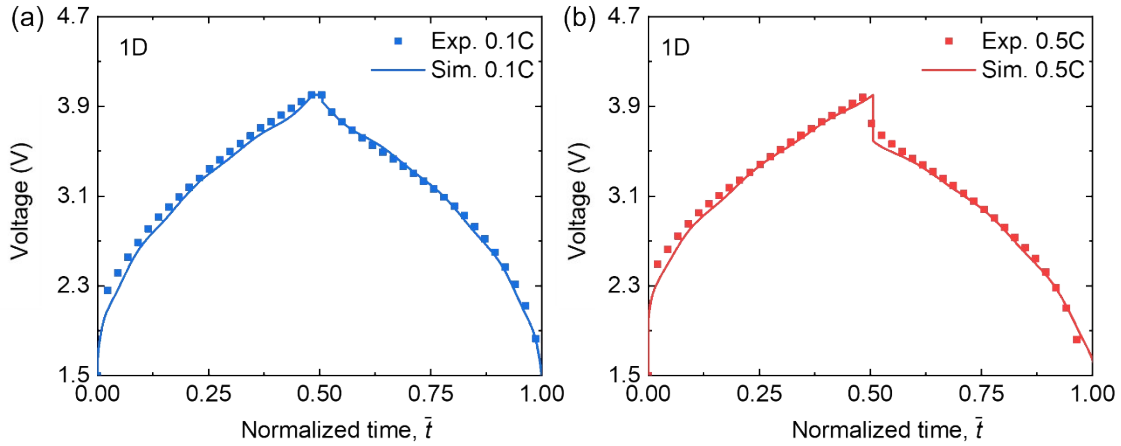

**Fig. S1 Model validation of sodium-ion batteries.** (a) Comparison between experimental measurements and one-dimensional (1D) model predictions of voltage evolution during charge–discharge at 0.1C. (b) Experimental and simulated voltage profiles at a higher rate of 0.5C, demonstrating the model's capability to capture rate-dependent electrochemical behavior. Here, normalization is performed using the full-cycle duration at the corresponding C-rate.

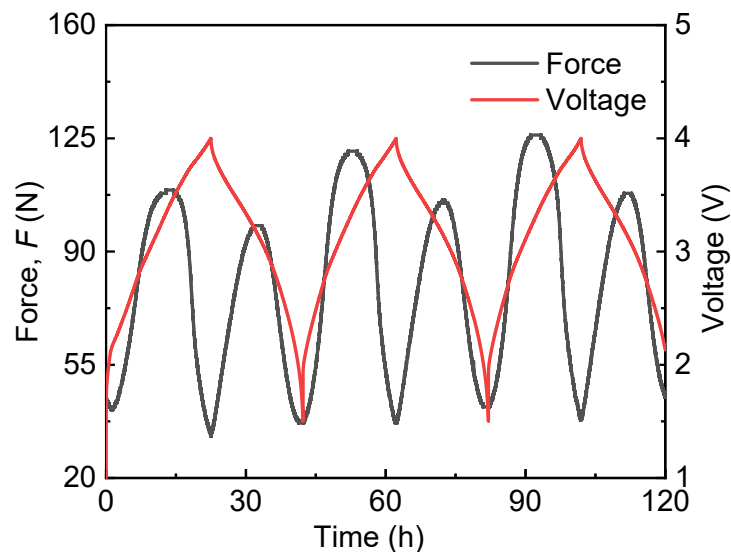

**Fig. S2** Evolution of swelling force and cell voltage as a function of time during cycling under a preloading force of 45 N and a current of 10 mA. The force signal exhibits periodic variation that correlates with the charge-discharge process, while the voltage profile shows the corresponding electrochemical cycling behavior over repeated cycles.

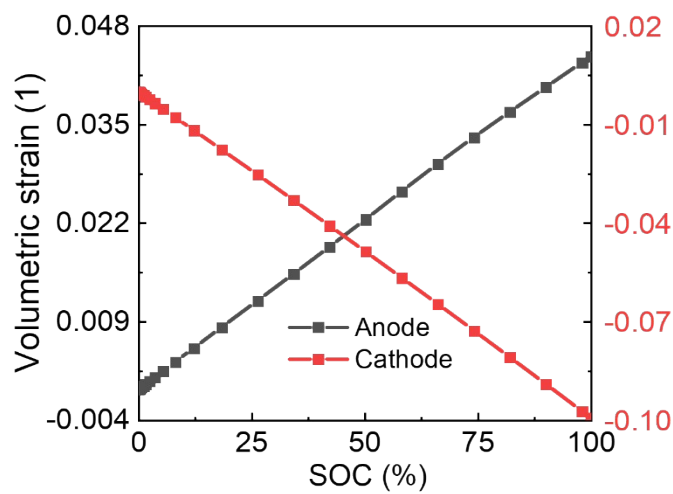

**Fig. S3** Evolution of volumetric strain in the anode and cathode particle as a function of state of charge, highlighting monotonic anode expansion and cathode shrinkage during cycling.

## References

- [1] B. Liu, Y. Jia, J. Li, S. Yin, C. Yuan, Z. Hu, L. Wang, Y. Li, J. Xu, *J. Mater. Chem. A* 6 (2018) 21475–21484.
- [2] H. Li, D. Zhou, M. Zhang, B. Liu, C. Zhang, *Energy* 263 (2023) 126027.
- [3] X. Feng, X. He, M. Ouyang, L. Wang, L. Lu, D. Ren, S. Santhanagopalan, *J. Electrochem. Soc.* 165 (2018) null.
- [4] P.T. Coman, E.C. Darcy, C.T. Veje, R.E. White, *J. Electrochem. Soc.* 164 (2017) A587.
- [5] M. Doyle, J. Newman, A.S. Gozdz, C.N. Schmutz, J.-M. Tarascon, *J. Electrochem. Soc.* 143 (1996) 1890.
- [6] M. Doyle, T.F. Fuller, J. Newman, *J. Electrochem. Soc.* 140 (1993) 1526–1533.
- [7] M. Doyle, J. Newman, *Electrochim. Acta.* 40 (1995) 2191–2196.
- [8] K. Chayambuka, G. Mulder, D.L. Danilov, P.H.L. Notten, *Electrochim. Acta* 404 (2022) 139764.
- [9] D. Kim, E. Lee, M. Slater, W. Lu, S. Rood, C.S. Johnson, *Electrochemistry Communications* 18 (2012) 66–69.
